# Supplementary material for: Synthesis and characterization of thianthrene-based poly(phenylene sulfide)s with high refractive index over 1.8
Source: Royal Society of Chemistry journal article supplement (doi:10.1039/c1jm12402a), 2011-01-01

## Supplementary Information

### Synthesis and Characterization of Thianthrene-based Poly(phenylene sulfide)s with High Refractive Index over 1.8

Yasuo Suzuki,<sup>a</sup> Kimiya Murakami,<sup>a</sup> Shinji Ando,<sup>a</sup> Tomoya Higashihara,<sup>a</sup> and Mitsuru Ueda<sup>\*,a</sup>

<sup>a</sup>Department of Organic and Polymeric Materials, Graduate School of Science and Engineering, Tokyo Institute of Technology, 2-12-1 O-okayama, Meguro-ku, Tokyo 152-8552, Japan. E-mail: ueda.m.ad@m.titech.ac.jp

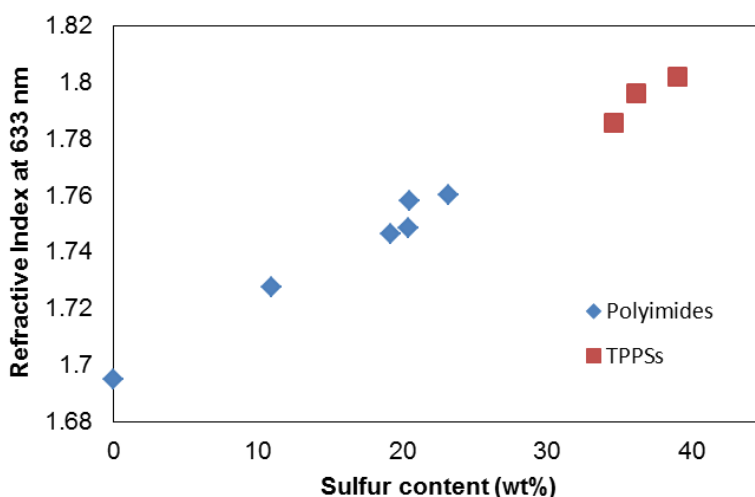

The Figure shows refractive index values of wholly aromatic polyimides (depicted below) obtained in the previous works and TPPSs, depending on sulfur contents. Clear correlation between sulfur content and refractive index can be observed.

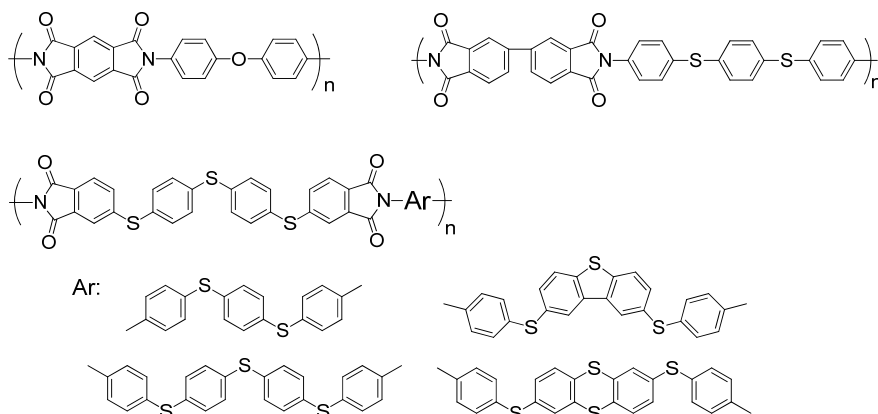

Supplement: c1jm12402a.pdf [file c1jm12402a.pdf]
